# Supplementary material
Source: PubMed Central journal article supplement (PMC4351915)
Supplement: NIHMS62002-supplement-sup14.pdf [file NIHMS62002-supplement-sup14.pdf]

A

**Summary for ENSDARG0000007430**  
 available *in situ* images

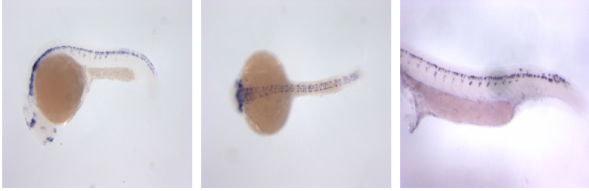

**full name**  
PR domain containing 12

**human ortholog**  
PRDM12

**Gene Ontology**  
 GO:0003676: molecular\_function nucleic acid binding  
 GO:0003677: molecular\_function DNA binding  
 GO:0005515: molecular\_function protein binding  
 GO:0005622: cellular\_component intracellular  
 GO:0008270: molecular\_function zinc ion binding

**functional class**  
chromatin remodelling, DNA binding

**descriptive expression pattern**  
telencephalon, spinal cord, cranial ganglia, otic vesicle, interneuron, pretectum, hindbrain, hypophysis

**clones mapped to this gene**  
invb17m08, invb63m01, inva9e01, invb47k13, if2b01, inva71f11, invb52h12, invb10k04, invb59m14, invb23m20, invb15p21, invb70m22, inva11g15

**clone history of its4b04**  
its4b04->inva10a19->t1g06

**external database identifiers**  
 Ensembl: ENSDARG0000007430  
 UniGene: Dr.23693  
 Refseq: NM\_001007457.1  
 EMBL: BC085382

**genomic location**  
chromosome 5, 66656224 - 66660563

**mapped interpro domains**  
IPR001214, IPR015880, IPR003856, IPR017126, IPR007087

**Enzymes used for probe preparation**  
XhoI, T3

**integrity of clone-cds (based on unigene)**  
clone is full length

**PubMed articles on**  
no articles found searching for and zebrafish

**microarray expression profiles**

| Stage | Expression values | Standard deviation |       |       |       |      |      |     |     |
|-------|-------------------|--------------------|-------|-------|-------|------|------|-----|-----|
| 69*   | 62*               | 567                | 1140  | 1277  | 310   | 283  | 534  | 99* | 81* |
| (14)  | (4)               | (40)               | (184) | (104) | (112) | (20) | (44) | (2) | (5) |

2 cells, 30% epib., 1-6 som., 24 hpf, 48 hpf, 5 dpf, dienceph., telenceph., adult head, adult tail

\* expression values below 100 are regarded as not statistically significant and therefore not shown as bars

**RNA seq expression profile**

| Stage         | Expression (fpm) |
|---------------|------------------|
| 16-32 hpf     | 19.03            |
| 5 dpf         | 5.73             |
| adult head    | 1.15             |
| adult tail    | 0                |
| adult telenc. | 12.38            |

B

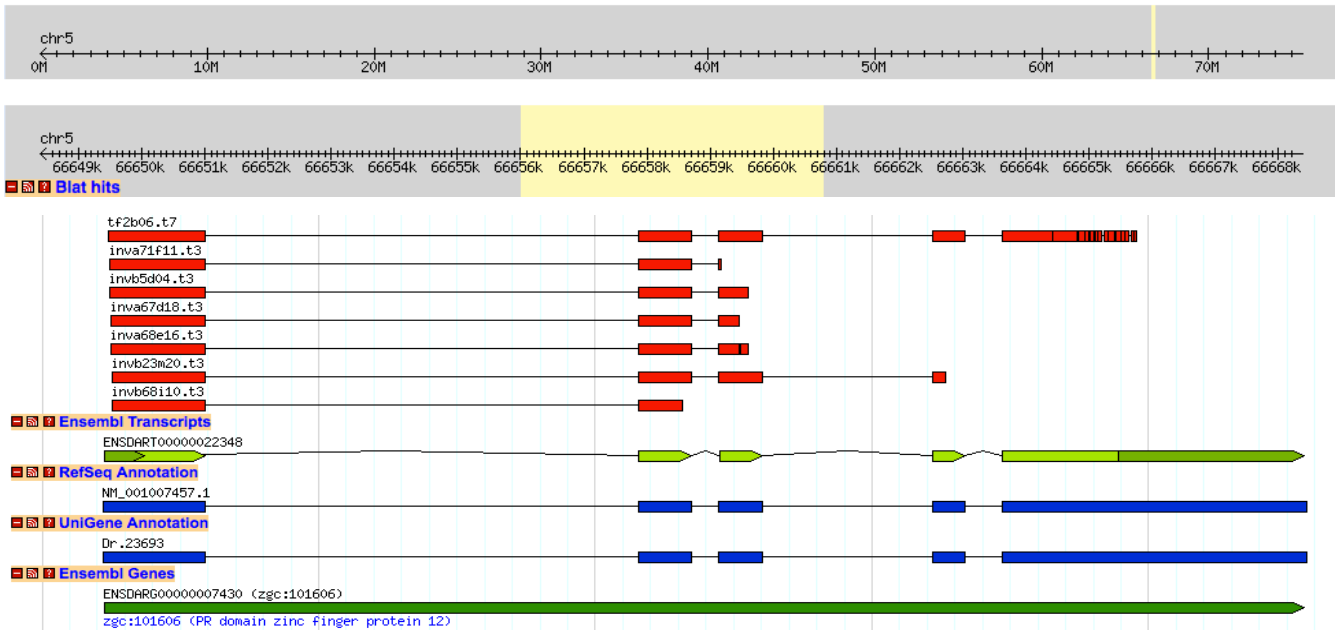

Supplementary Figure 7
