# Supplementary material
Source: PubMed Central journal article supplement (PMC4351915)

A

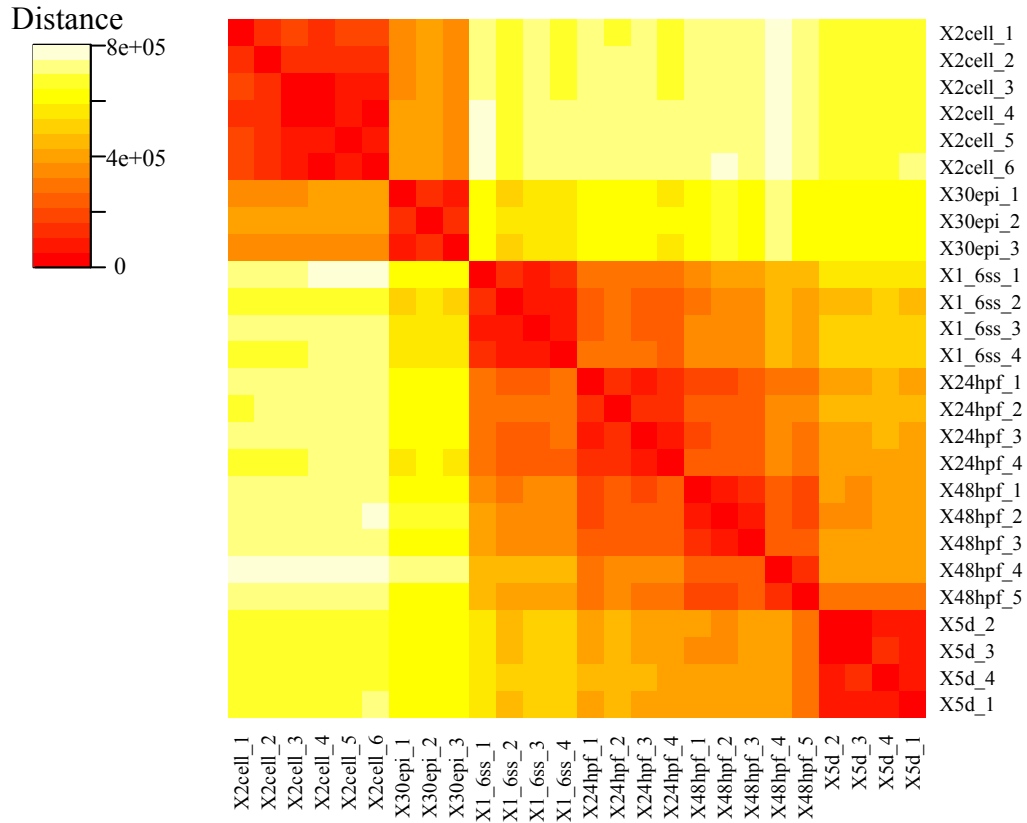

B

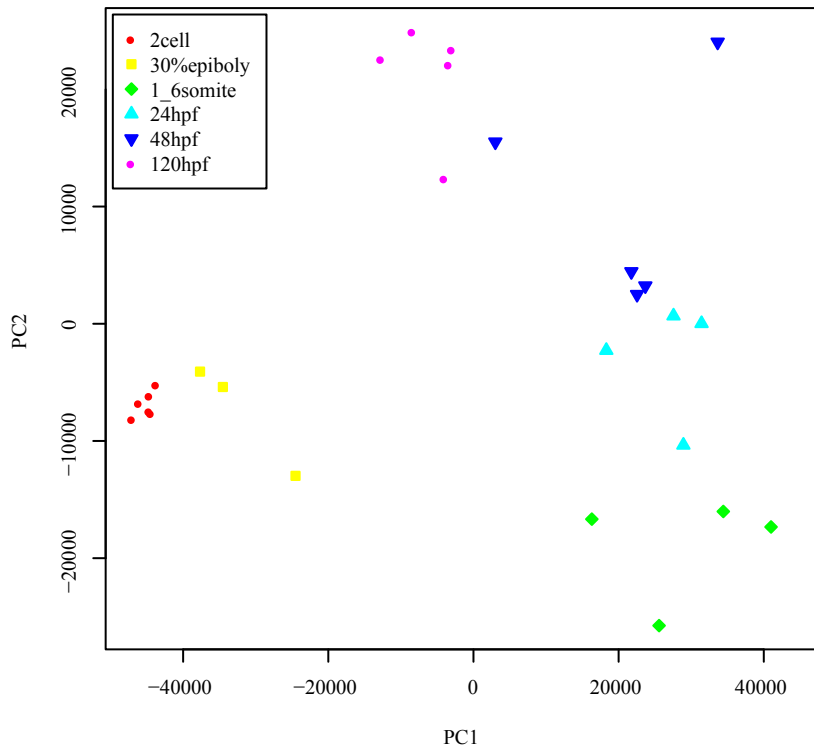

Supplementary Figure S1

Supplement: NIHMS62002-supplement-sup08.pdf [file NIHMS62002-supplement-sup08.pdf]

## A Early development

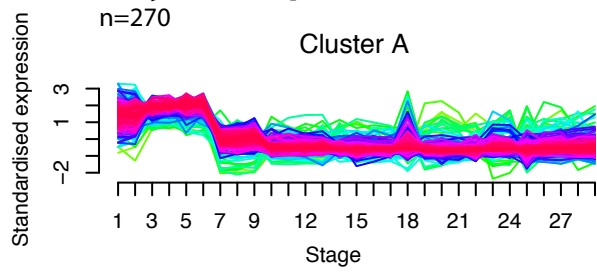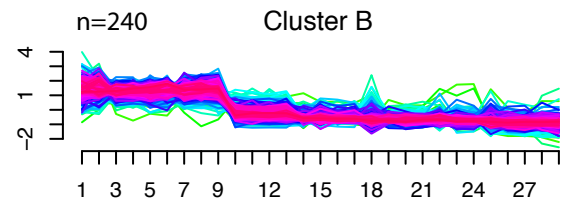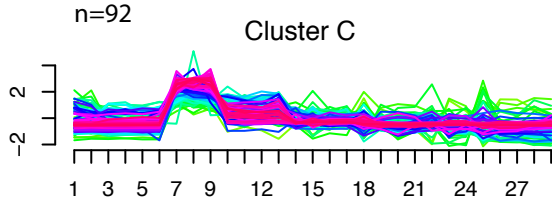

## Organogenesis

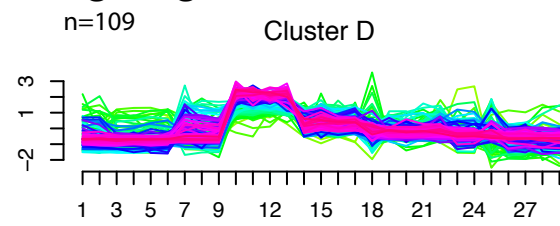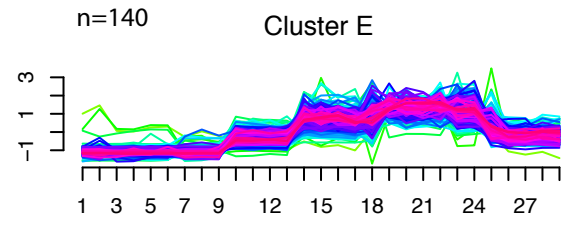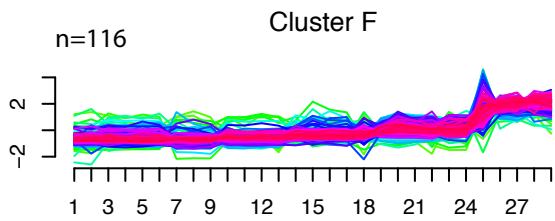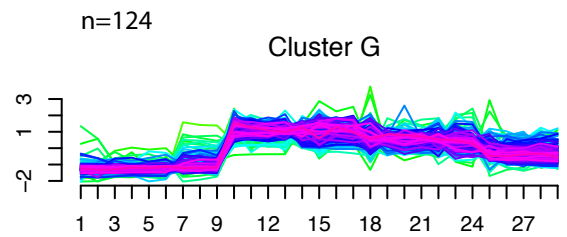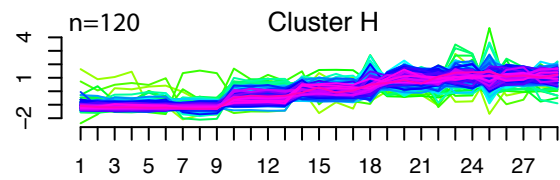

## B

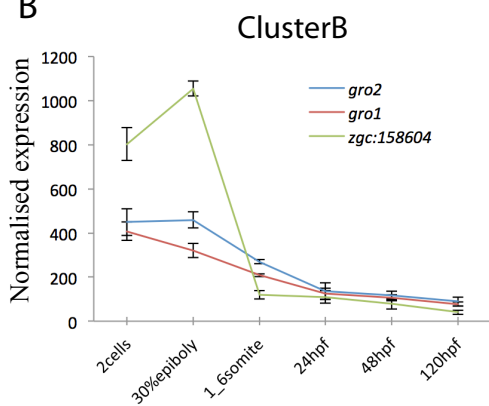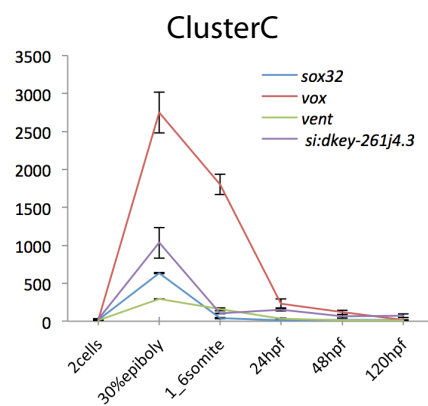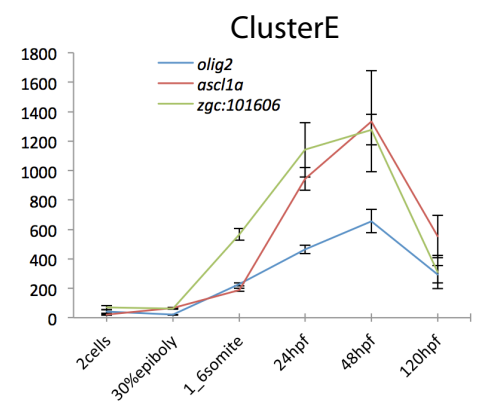

Supplementary Figure S2

Supplement: NIHMS62002-supplement-sup09.pdf [file NIHMS62002-supplement-sup09.pdf]

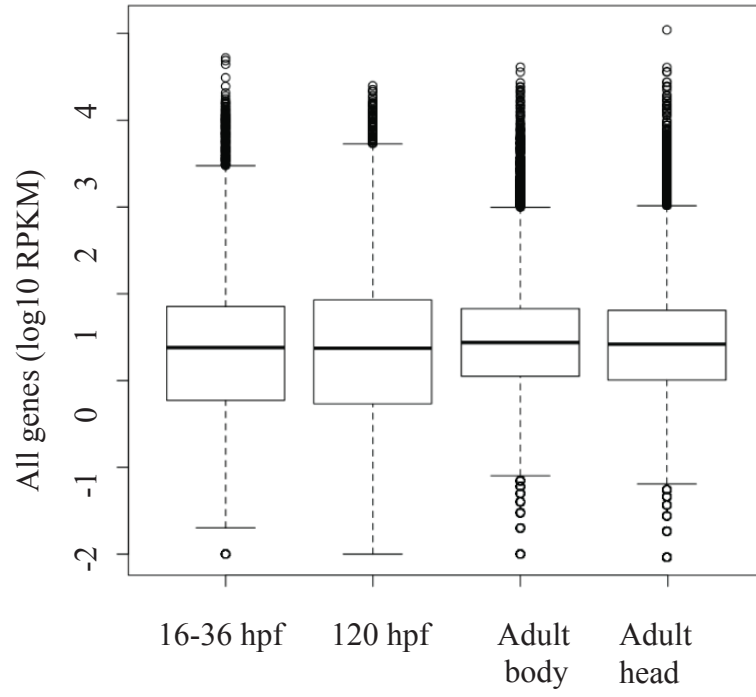

Supplementary Figure S3

Supplement: NIHMS62002-supplement-sup10.pdf [file NIHMS62002-supplement-sup10.pdf]

24hpf (paired end)

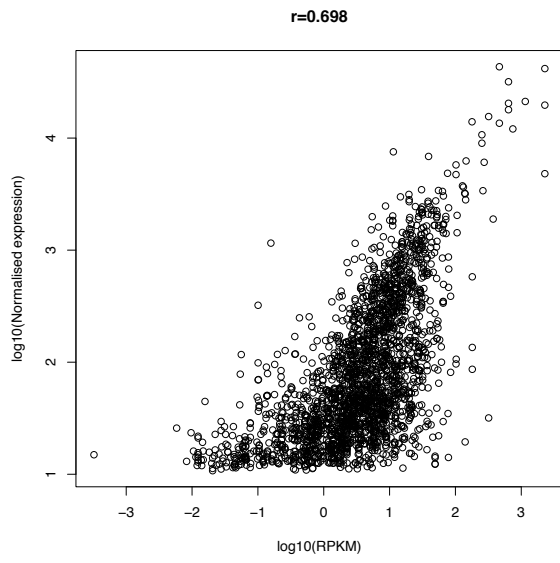

120hpf (single end)

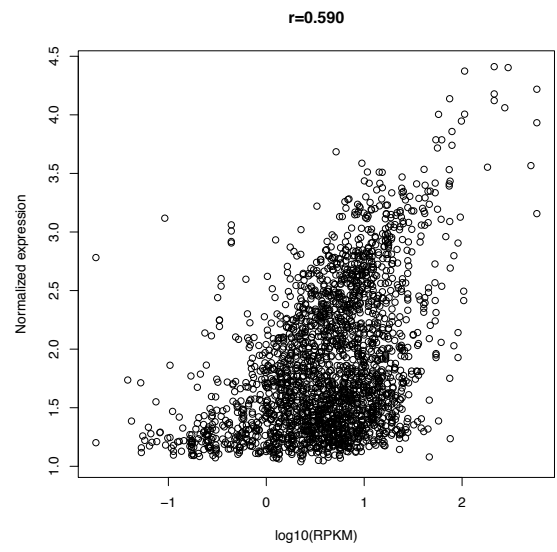

24hpf (single end)

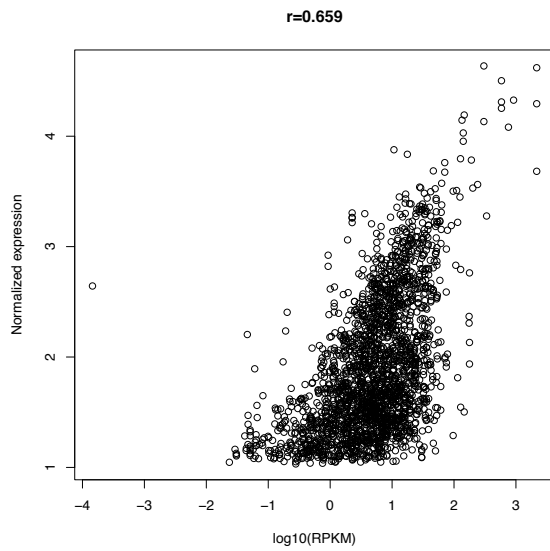

Supplementary Figure S4

Supplement: NIHMS62002-supplement-sup11.pdf [file NIHMS62002-supplement-sup11.pdf]

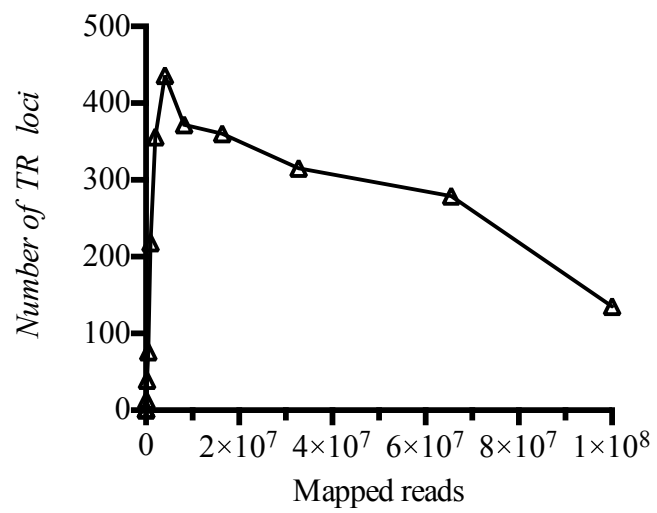

Supplementary Figure S5

Supplement: NIHMS62002-supplement-sup12.pdf [file NIHMS62002-supplement-sup12.pdf]

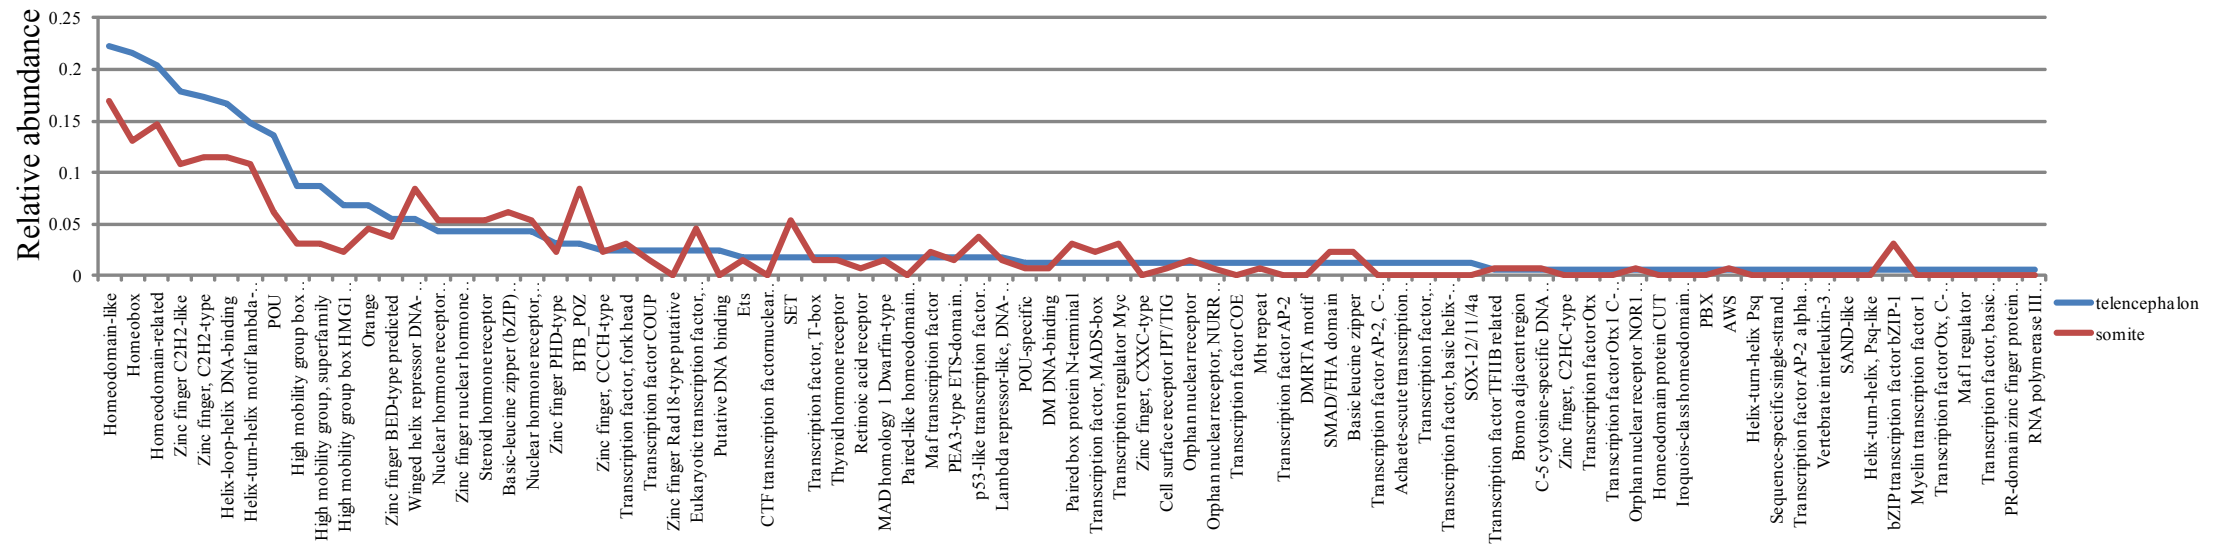

Supplemental Fig. S6

Supplement: NIHMS62002-supplement-sup13.pdf [file NIHMS62002-supplement-sup13.pdf]
